# Supplementary material for: Efficient removal of cationic dyes using a new magnetic nanocomposite based on starch-g-poly(vinylalcohol) and functionalized with sulfate groups
Source: Royal Society of Chemistry journal article supplement (doi:10.1039/c6ra02517j), 2016-01-01
Supplement: c6ra02517j1.pdf [file c6ra02517j1.pdf]

## Supplementary

### **Efficient removal of cationic dyes using a new magnetic nanocomposite based on starch-g-poly (vinylalcohol) and functionalized with sulfate groups**

Ali Pourjavadi<sup>\*, a</sup>, Azardokht Abedin-Moghanaki<sup>a</sup>, Amir Tavakoli<sup>a</sup>

<sup>a</sup>Polymer Research Laboratory, Department Of Chemistry, Sharif University of Technology, Azadi Avenue, P.O.Box 11365-9516, Tehran, Iran

---

\* Corresponding author  
E- mail address: [purjavad@sharif.edu](mailto:purjavad@sharif.edu)

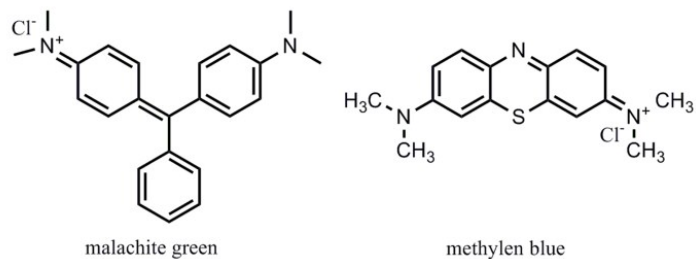

**Fig. S1** Structure of dyes

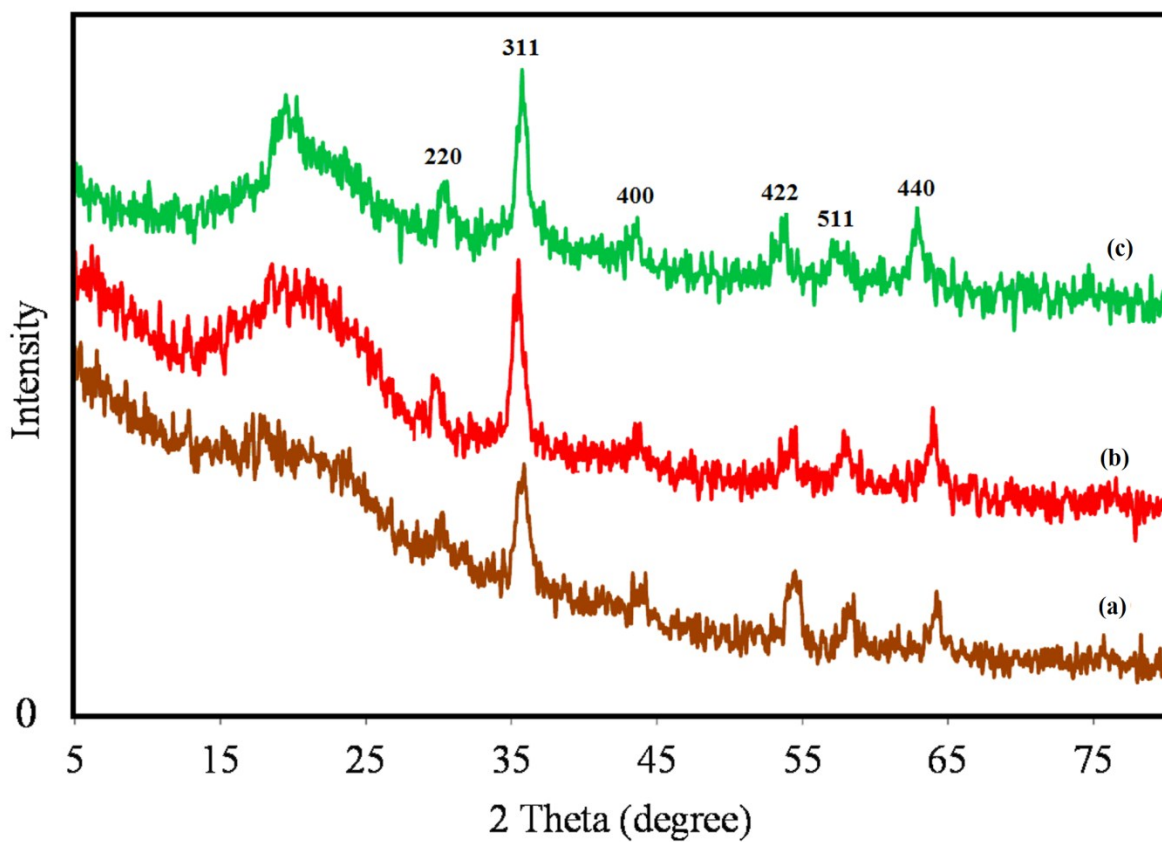

**Fig. S2** XRD patterns of MNP (a), MNP@St-g-PVAc (b) and MNP@St-g-PVS nanocomposite

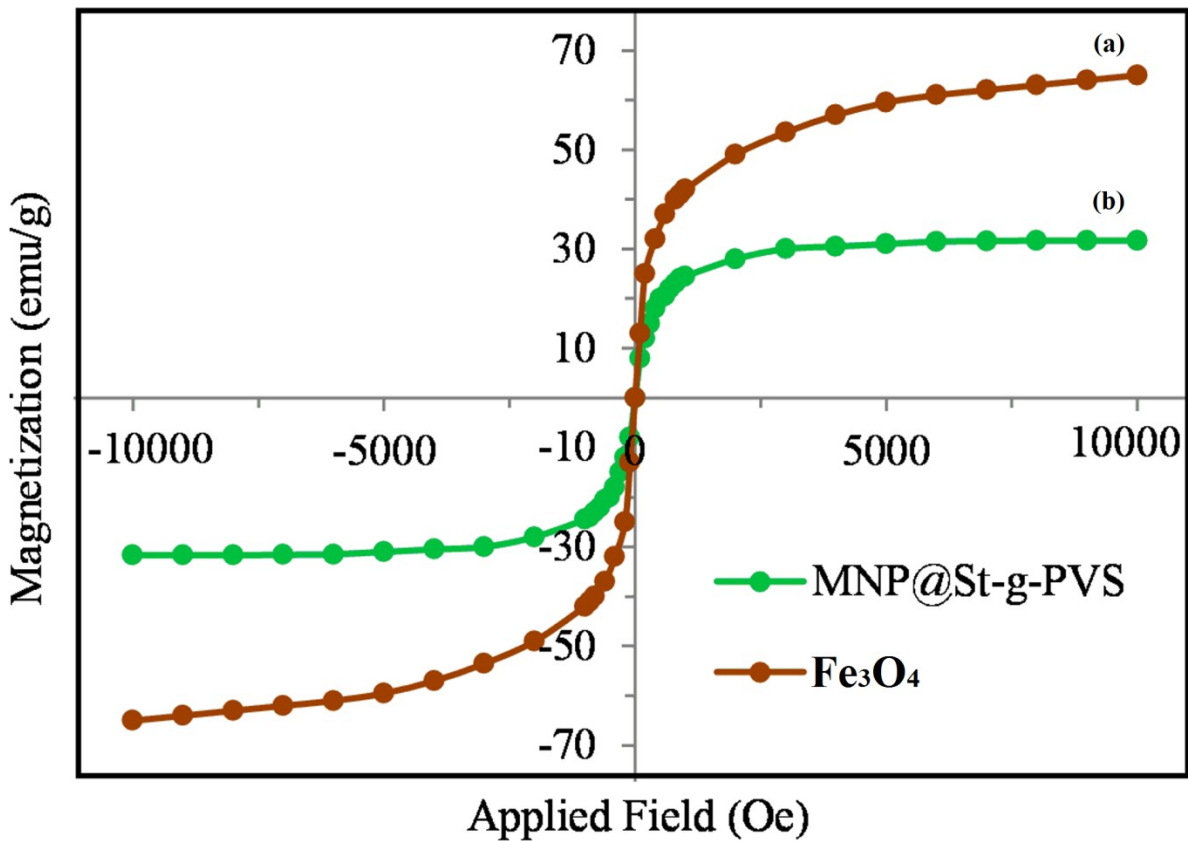

Fig. S3 Room-temperature magnetization curves for Fe<sub>3</sub>O<sub>4</sub> (a) and MNP@St-g-PVS (b)

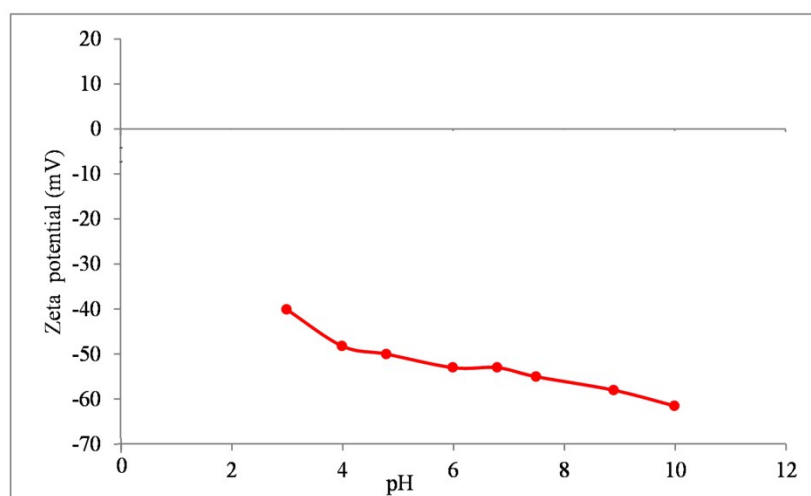

Fig. S4 Zeta potentials of MNP@St-g-PVS adsorbent
